# Supplementary material
Source: HighWire-hosted journal article supplement (http://casereports.bmj.com/highwire/filestream/185212/field_highwire_adjunct_files/0/bcr-2014-205983supp.pdf)

Supplementary Figure 1: The patient's chest radiograph.

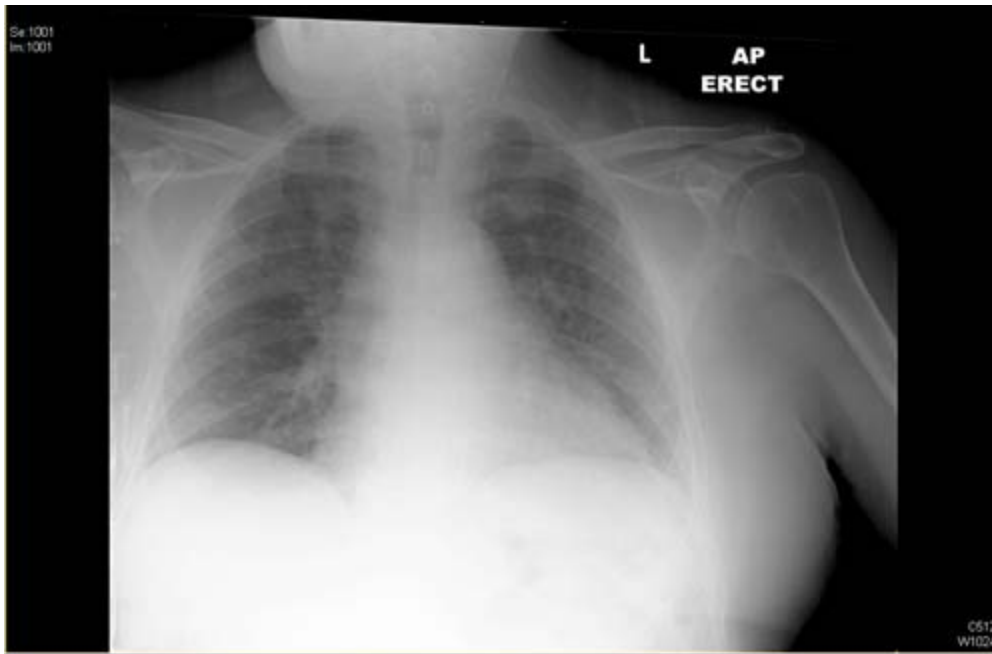

Supplement: bcr-2014-205983supp.pdf [file bcr-2014-205983supp.pdf]
